# Supplementary material for: Location-selective growth of two-dimensional metallic/semiconducting transition metal dichalcogenide heterostructures
Source: Royal Society of Chemistry journal article supplement (doi:10.1039/c8nr08744j), 2019-01-01
Supplement: c8nr08744j1.pdf [file c8nr08744j1.pdf]

## Supporting Information

### **Location-selective Growth of Two-dimensional Metallic/Semiconducting Transition Metal Dichalcogenide Heterostructures**

*Xue Gong<sup>a,b,c</sup>, Xiaoxu Zhao<sup>d</sup>, Mei Er Pam<sup>c</sup>, Huizhen Yao<sup>a,b</sup>, Zibo Li<sup>a,b</sup>, Dechao Geng<sup>c</sup>, Stephen J. Pennycook<sup>\*d</sup>, Yumeng Shi<sup>\*a,b</sup>, Hui Ying Yang<sup>\*c</sup>*

<sup>a</sup> International Collaborative Laboratory of 2D Materials for Optoelectronic Science & Technology of Ministry of Education, College of Optoelectronic Engineering, Shenzhen University, Shenzhen 518060, China.

<sup>b</sup> Engineering Technology Research Center for 2D Material Information Function Devices and Systems of Guangdong Province, College of Optoelectronic Engineering, Shenzhen University, Shenzhen 518060, China.

<sup>c</sup> Pillar of Engineering Product Development, Singapore University of Technology and Design, 8 Somapah Road, 487371, Singapore.

<sup>d</sup> Department of Materials Science and Engineering, National University of Singapore, 9 Engineering Drive 1, 117575, Singapore.

E-mail: yanghuiying@sutd.edu.sg, yumeng.shi@szu.edu.cn

#### **Materials and Instruments**

Unless otherwise noted, all chemicals were purchased from Sigma-Aldrich and used without further purification. Optical images were obtained using an Olympus BX51 microscope. AFM images were obtained using a Bruker Dimension FastScan atomic force microscope in the tapping mode. Raman spectra and PL spectra were recorded at room temperature using a WITec Raman microscope with laser excitation at 532 nm. Atomic-resolution STEM-ADF imaging was carried out on an aberration-corrected JEOL ARM200F, equipped with a cold field emission gun, operating at 60 kV.

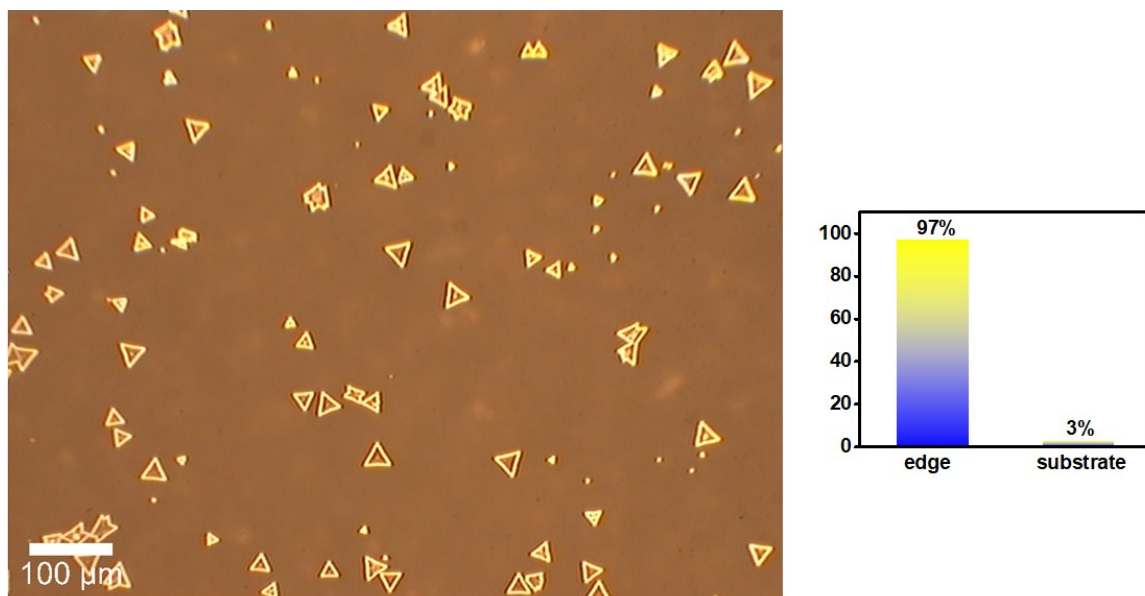

**Figure S1.** Optical microscopy images of the NbS<sub>2</sub>/WS<sub>2</sub> heterostructure in large scale and the distribution of NbS<sub>2</sub> flakes on edge of WS<sub>2</sub> or substrate.

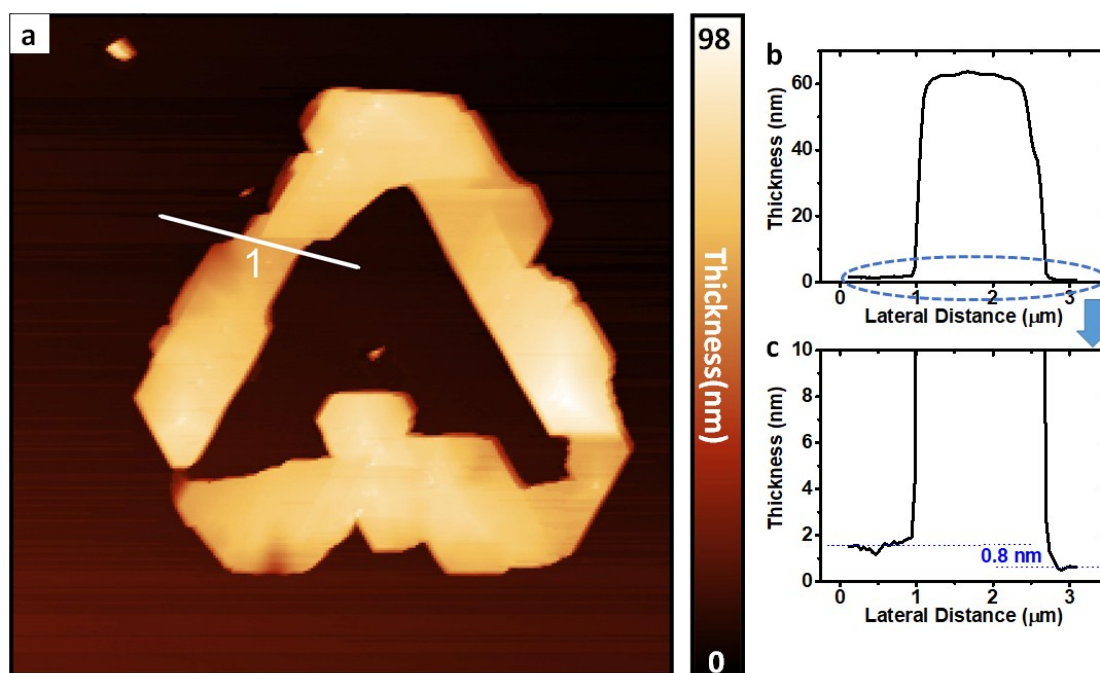

**Figure S2.** a) AFM height image of NbS<sub>2</sub>/ WS<sub>2</sub> heterostructure; b, c) thickness of NbS<sub>2</sub> and WS<sub>2</sub>.

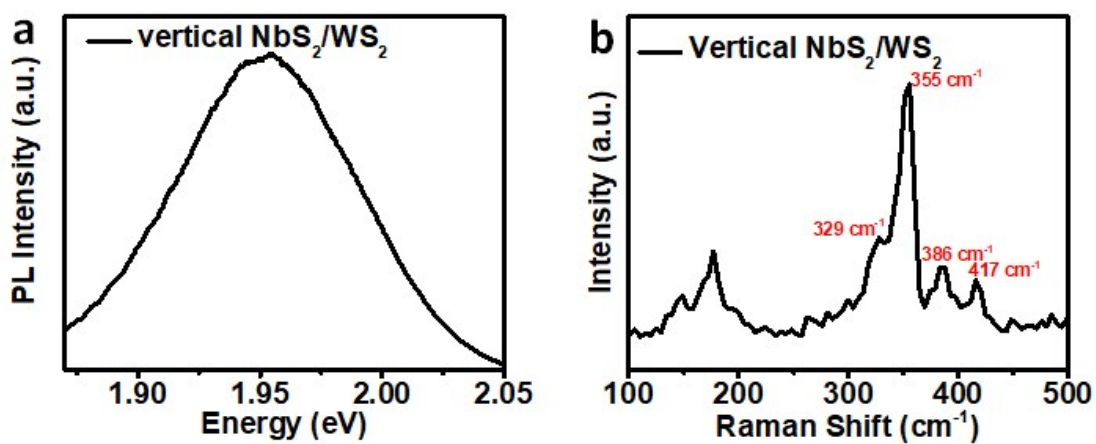

**Figure S3.** (a) PL spectrum of vertical NbS<sub>2</sub>/WS<sub>2</sub> heterostructure and (b) its corresponding Raman curve.

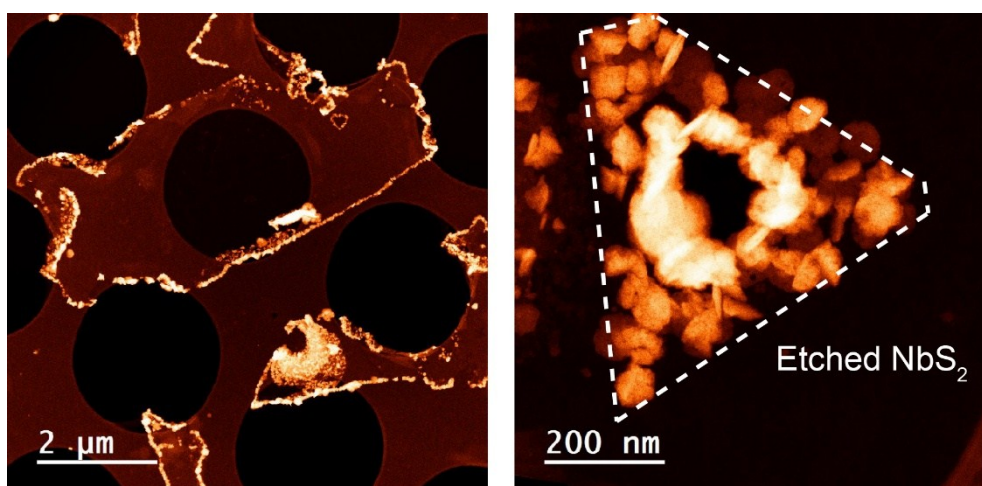

**Figure S4.** STEM-ADF images showing the morphology of the NbS<sub>2</sub>/WS<sub>2</sub> heterostructures.

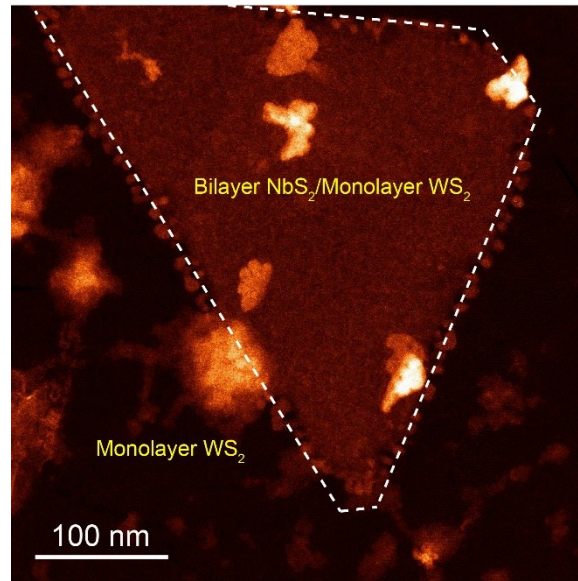

**Figure S5.** A STEM-ADF image depicting the morphology of the as-grown NbS<sub>2</sub>/WS<sub>2</sub> heterostructure.

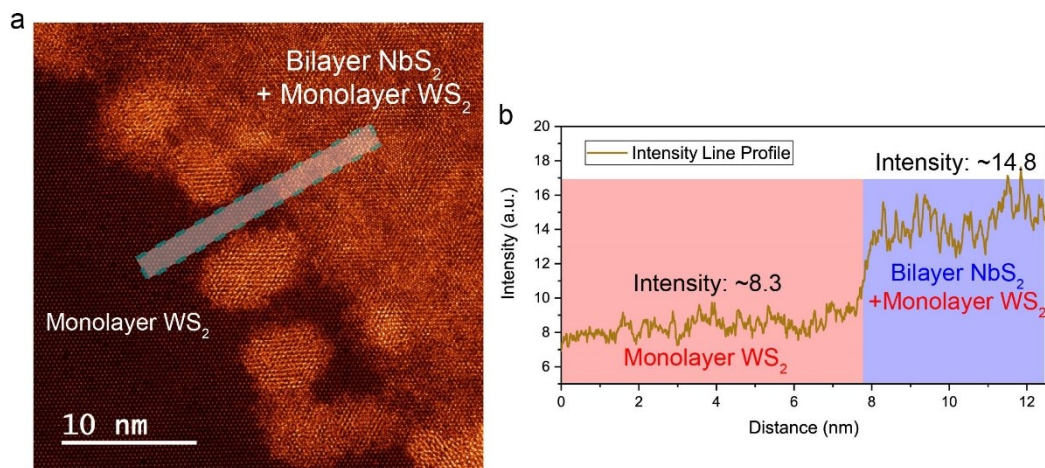

**Figure S6.** (a) An atomic-resolution STEM image showing the interface between monolayer WS<sub>2</sub> and vertical NbS<sub>2</sub>/WS<sub>2</sub>. (b) Intensity line profile of the white region in (a). According to the theoretical the image contrast between a monolayer WS<sub>2</sub> (W = 74; S = 16) to a bilayer NbS<sub>2</sub> (Nb = 41, S = 16) is about ~1.3. From the experimental image, the contrast of the monolayer WS<sub>2</sub> is around ~8.3, and the NbS<sub>2</sub>/WS<sub>2</sub> region is about ~14.8 where the vacuum region is normalized to zero. The contrast ratio between the monolayer WS<sub>2</sub> to the as-grown NbS<sub>2</sub> is ~1.28, confirming the as-grown NbS<sub>2</sub> crystal is bilayer.



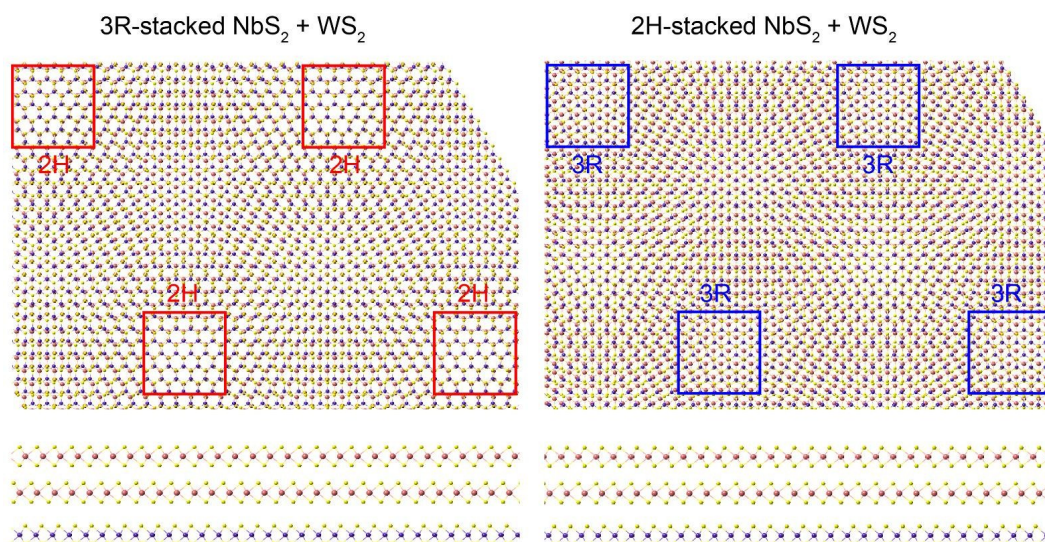

**Figure S7.** Atomic models showing the interlayer stacking registry evolution between 3R-stacked (left) and 2H-stacked NbS<sub>2</sub> with respect to the monolayer WS<sub>2</sub>.
